# Supplementary material for: Selection and Evaluation of Reference Genes for Expression Studies with Quantitative PCR in the Model Fungus Neurospora crassa under Different Environmental Conditions in Continuous Culture
Source: PubMed Central journal article supplement (PMC4256298; doi:10.1371/journal.pone.0112706), 2014-12-04
Supplement: pone.0112706.s011.pdf [file pone.0112706.s011.pdf]

Table S2.

| <b>Gene/Condition</b>  | <b>Ratio W</b> | <b>Ratio p</b> | <b>Pass/Fail</b> | <b>C<sub>T</sub> W</b> | <b>C<sub>T</sub> p</b> | <b>Pass/Fail</b> |
|------------------------|----------------|----------------|------------------|------------------------|------------------------|------------------|
| <b>ACT Light/Dark</b>  | 0.829          | 0.058          | Passed           | 0.915                  | 0.388                  | Passed           |
| <b>ACT All Dark</b>    | 0.847          | 0.054          | Passed           | 0.977                  | 0.950                  | Passed           |
| <b>ACT Temp</b>        | 0.842          | 0.029          | Failed           | 0.957                  | 0.741                  | Passed           |
| <b>ASL Light/Dark</b>  | 0.916          | 0.402          | Passed           | 0.88                   | 0.188                  | Passed           |
| <b>ASL All Dark</b>    | 0.887          | 0.157          | Passed           | 0.924                  | 0.395                  | Passed           |
| <b>ASL Temp</b>        | 0.896          | 0.141          | Passed           | 0.948                  | 0.601                  | Passed           |
| <b>ADK Light/Dark</b>  | 0.909          | 0.349          | Passed           | 0.908                  | 0.339                  | Passed           |
| <b>ADK All Dark</b>    | 0.761          | 0.005          | Failed           | 0.934                  | 0.489                  | Passed           |
| <b>ADK Temp</b>        | 0.862          | 0.052          | Passed           | 0.924                  | 0.324                  | Passed           |
| <b>VMA3 Light/Dark</b> | 0.922          | 0.488          | Passed           | 0.887                  | 0.219                  | Passed           |
| <b>VMA3 All Dark</b>   | 0.838          | 0.042          | Failed           | 0.934                  | 0.490                  | Passed           |
| <b>VMA3 Temp</b>       | 0.841          | 0.028          | Failed           | 0.986                  | 0.997                  | Passed           |
